# Supplementary material for: EZH2 is crucial for both differentiation of regulatory T cells and T effector cell expansion
Source: PubMed Central journal article supplement (PMC4473539; doi:10.1038/srep10643), 2015-06-19
Supplement: srep10643-s1.pdf [file srep10643-s1.pdf]

**Supplementary information for EZH2 is crucial for both differentiation of  
regulatory T cells and T effector cell expansion**

Xiang-Ping Yang<sup>1, 2, 7\*</sup>, Kan Jiang<sup>2, 7</sup>, Kiyoshi Hirahara<sup>2</sup>, Golnaz Vahedi<sup>2</sup>, Behdad Afzali<sup>2,3</sup>, Giuseppe Sciume<sup>2</sup>, Michael Bonelli<sup>2</sup>, Hong-Wei Sun<sup>4</sup>, Dragana Jankovic<sup>5</sup>, Yuka Kanno<sup>2</sup>, Vittorio Sartorelli<sup>6</sup>, John J O'Shea<sup>2</sup>, Arian Laurence<sup>2\*</sup>

<sup>1</sup> Department of Immunology, School of Basic Medicine, Tongji Medical College, Huazhong University of Science and Technology, Wuhan, China, 430030  
<sup>2</sup>Lymphocyte Cell Biology Section, Molecular Immunology and Inflammation Branch, National Institutes of Arthritis, and Musculoskeletal and Skin Diseases National Institutes of Health, Bethesda, MD 20892, USA, <sup>3</sup>MRC Centre for Transplantation, King's College London, UK, <sup>4</sup>Biodata Mining and Discovery Section, National Institute of Arthritis and Musculoskeletal and Skin Diseases, National Institutes of Health, Bethesda, MD 20892-1930, USA, <sup>5</sup> Immunobiology Section, Laboratory of Parasitic Diseases, National Institute of Allergy and Infectious Diseases, <sup>6</sup>Laboratory of Muscle Stem Cells and Gene Regulation, National Institute of Arthritis and Musculoskeletal and Skin Diseases, National Institutes of Health, Bethesda, MD 20892-1930, USA, <sup>7</sup>These authors contributed equally.

\* Corresponding authors: Email: yangxp@hust.edu.cn, laurencea@mail.nih.gov

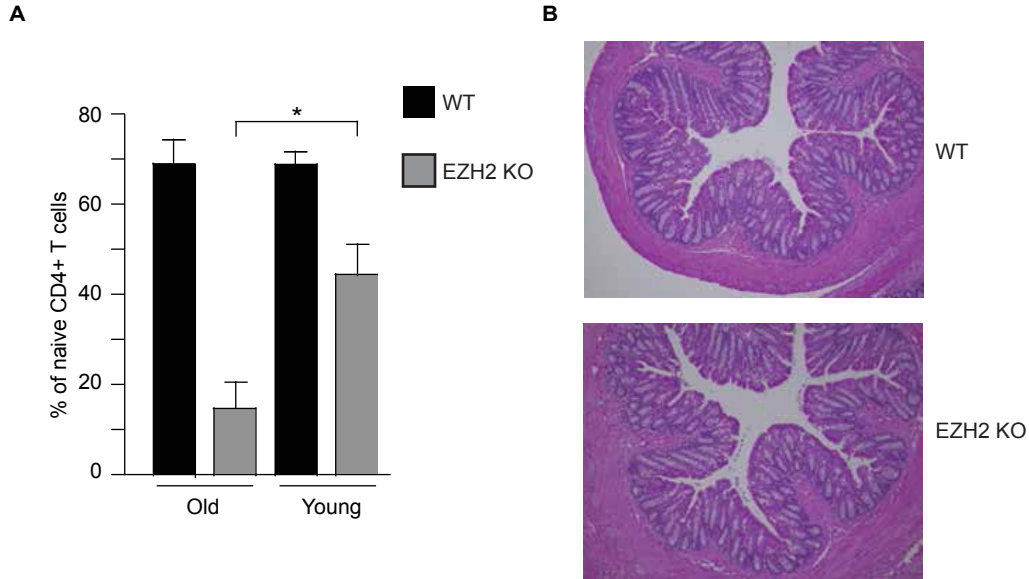

**Ezh2-deficient mice have fewer naïve T cells in their periphery with age.**

The spleen and mesenteric lymph nodes were isolated from Ezh2-deficient mice at age 6 weeks and 26 weeks, followed by red blood cell lysis. The isolated lymphocytes were stained for cell surface marks of CD4, CD62L, and CD44. (A) Cumulative histogram showing percentage of CD4<sup>+</sup>CD44<sup>low</sup>CD62L<sup>high</sup> and CD4<sup>+</sup>CD44<sup>high</sup>CD62L<sup>low</sup> in the spleen of Ezh2-deficient mice at age 6 weeks (young) or 26 weeks (old). \*P < 0.05 and \*\*P < 0.005 (unpaired t-test). (B) The histopathology staining of the colons of 6 month old control mice and Ezh2-deficient mice. Mouse tissues were fixed in 10% formyl-saline followed by embedding in paraffin blocks and tissue sections were stained in hematoxylin and eosin.

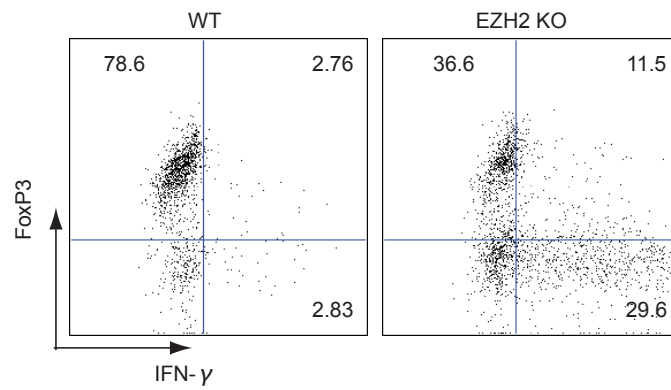

### Destablization of nTreg cells in the absence of EZH2

Sorted splenic CD4<sup>+</sup>CD25<sup>+</sup>nrp<sup>+</sup> cells from WT mice or EZH2-deficient mice were stimulated with anti-CD3/CD28 (10  $\mu$ g/ml) and IL-12 (10 ng/ml) for 3 days, expressions of FoxP3 and IFN- $\gamma$  were determined by flow cytometry.

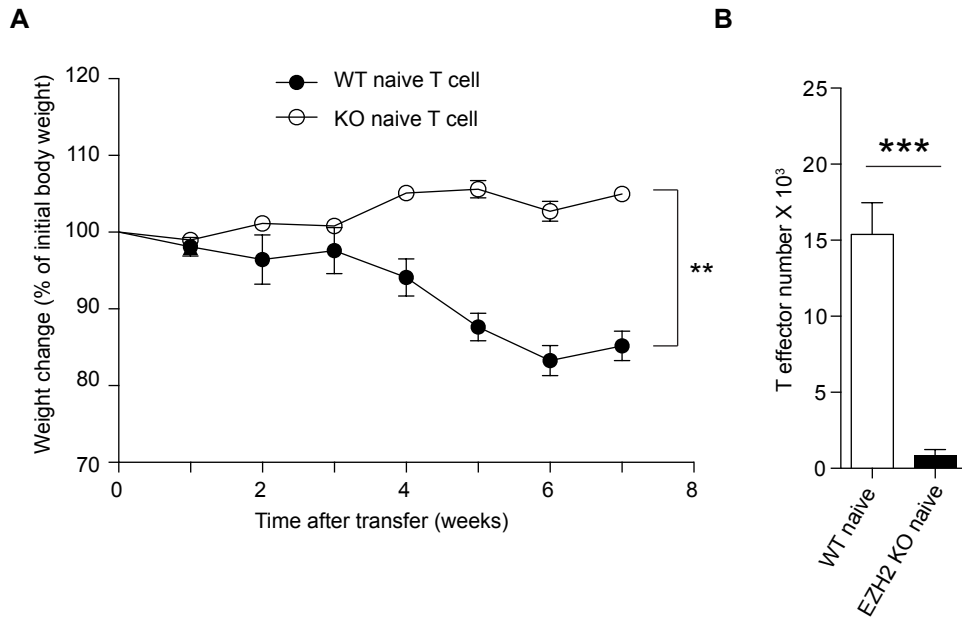

### Ezh2-deficient T cells failed to induce colitis.

Sorted  $4 \times 10^5$   $CD4^+CD45RB^{hi}CD25^-$  cells from CD45.1 control mice or sorted  $4 \times 10^5$   $CD4^+CD45RB^{hi}CD25^-$  cells from Ezh2-deficient mice were injected intravenously into 6-8 weeks Rag2<sup>-/-</sup> mice alone (n=5). Mice were monitored for evidence of colitis. (A) Weight loss (percentage of initial weight at day 0) was calculated for each mouse over 8 weeks. Data show mean ( $\pm$ SEM) weight changes for each group (n = 3–5 mice) (\*\*P < 0.01). (B) Total lymphocyte cells were recovered from the lamina propria. \*\*\*P < 0.01 (unpaired t-test).
